# Supplementary material
Source: PubMed Central journal article supplement (PMC4302074)

# Supplementary Figure 1

*Nfkb1*<sup>+/+</sup>

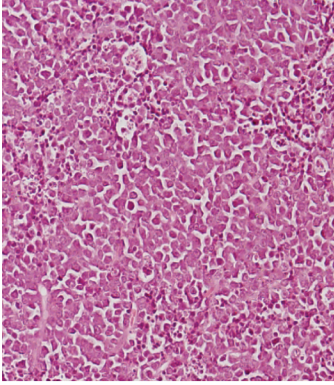

*Nfkb1*<sup>+/-</sup>

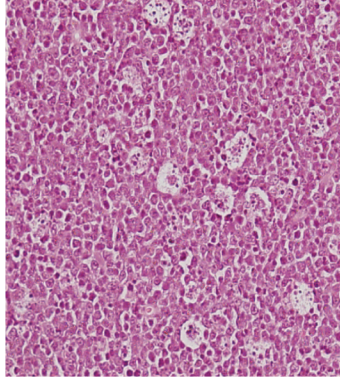

*Nfkb1*<sup>-/-</sup>

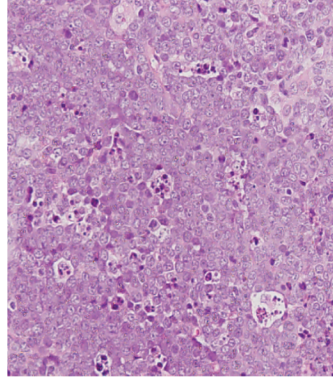

Supplement: NIHMS601455-supplement-2.pdf [file NIHMS601455-supplement-2.pdf]

# Supplementary Figure 2

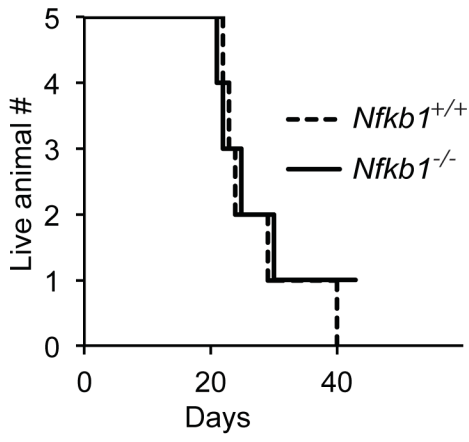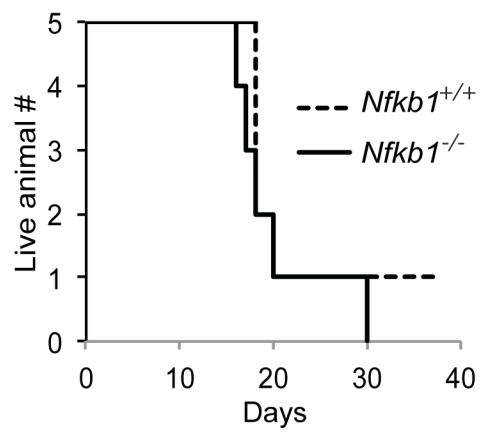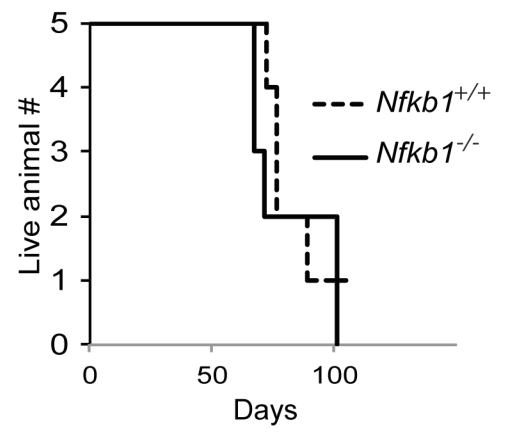

Supplement: NIHMS601455-supplement-3.pdf [file NIHMS601455-supplement-3.pdf]

# Supplementary Figure 3

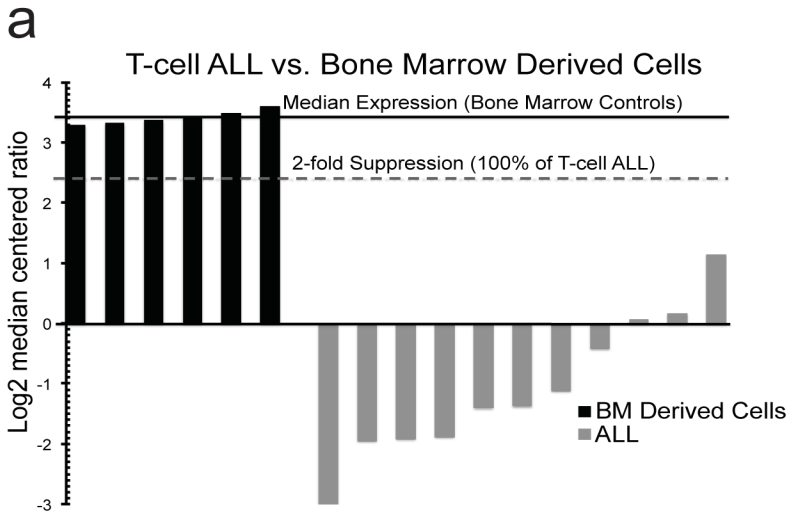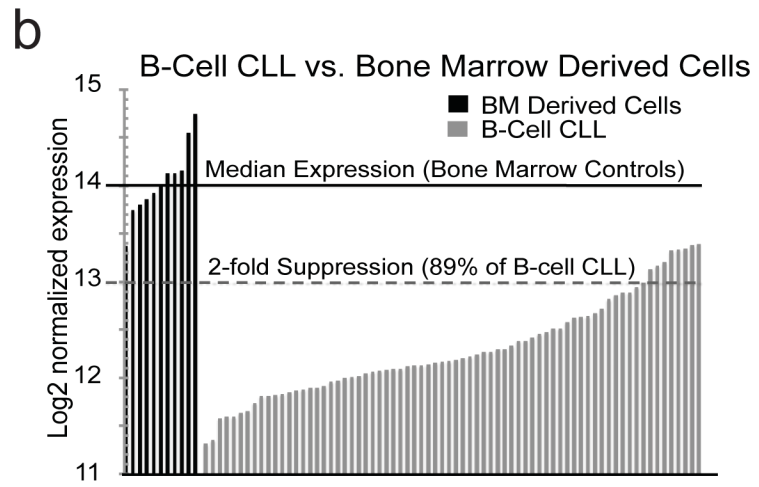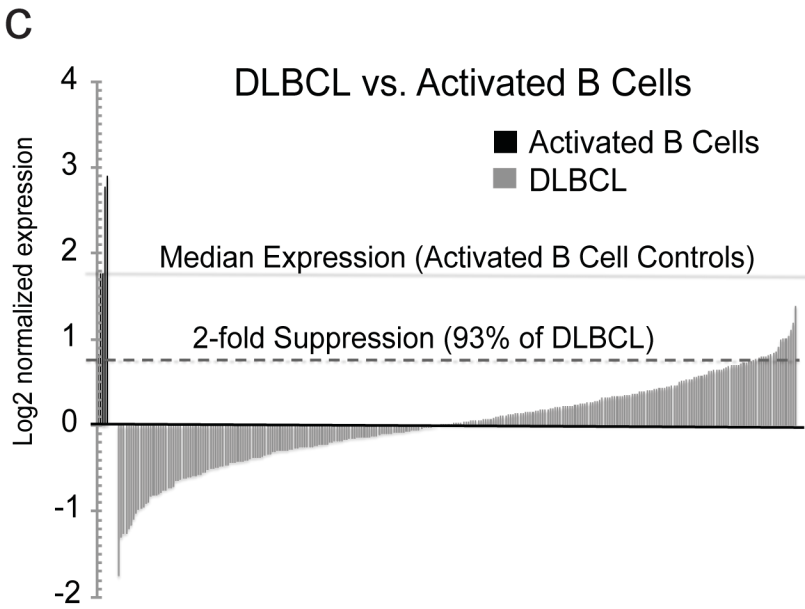

Supplement: NIHMS601455-supplement-4.pdf [file NIHMS601455-supplement-4.pdf]

Supplementary Figure 5

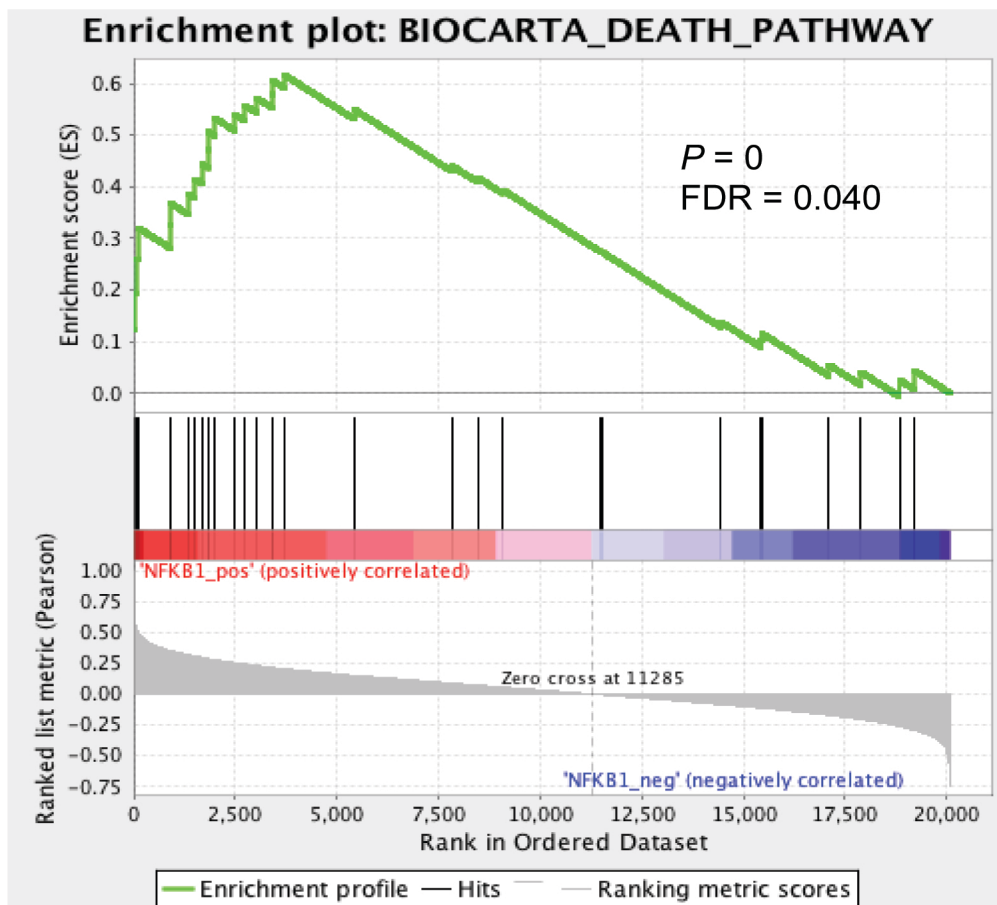

Supplement: NIHMS601455-supplement-6.pdf [file NIHMS601455-supplement-6.pdf]
